# Supplementary material
Source: publisher figshare collection journal article supplement (https://acs.figshare.com/ndownloader/files/28570448)
Supplement: Supplementary file 1 [file 28570448]

## Supporting Information for

### Engineering a bifunctional ComQXPA-P<sub>srfA</sub> quorum-sensing circuit for dynamic control of gene expression in *Corynebacterium glutamicum*

Haiyan Liu<sup>1,2</sup>, Feng Shi<sup>1,2,3,\*</sup>, Shuyu Tan<sup>1,2</sup>, Xiping Yu<sup>1,2</sup>, Wenmei Lai<sup>1,2</sup>, Yongfu Li<sup>4</sup>

<sup>1</sup>State Key Laboratory of Food Science and Technology, <sup>2</sup>Key Laboratory of Industrial Biotechnology,

Ministry of Education, School of Biotechnology, <sup>3</sup>International Joint Laboratory on Food Safety,

<sup>4</sup>National Engineering Laboratory for Cereal Fermentation Technology, Jiangnan University, Wuxi

214122, China

\*Corresponding author E-mail: [shifeng@jiangnan.edu.cn](mailto:shifeng@jiangnan.edu.cn)

Table S1. Sequences of nature and engineered P<sub>srfA</sub> promoters in this study.

Table S2. Strains used in this study.

Table S3. Plasmids used in this study.

Table S4. Primers used in this study.

Table S5. Sequences of sRNAs in this study.

Figure S1. Regulatory mechanism of the ComQXPA-P<sub>srfA</sub> QS system in *Bacillus subtilis*.

Figure S2. Fitted curve of strain QS1T2.

Figure S3. Architecture of the ComQXPA-P<sub>srfA</sub> QS-based *hfq*-sRNA circuit.

Figure S4. Fitted curves of strains QS1T22, QS1T23, QS1T24, QS1T25, QS1T26 and QS1T27.

Figure S5. SDS-PAGE of different *amyE*-expressing strains regulated by ComQXPA-P<sub>srfA</sub> QS circuits.

Figure S6. Inhibition efficiency of different P<sub>srfA</sub>M-regulated *hfq*-sRNA cassettes targeting *amyE* in *C. glutamicum*.

**Table S1.** Sequences of natural and engineered  $P_{srfA}$  promoters in this study.

| Promoter           | Sequence                                                               |
|--------------------|------------------------------------------------------------------------|
| $P_{srfA}$         | <b>GTGATA</b> AAAAACATTTTTTTTCATTTAA <b>ACTGA</b> ACGGTAGAAA           |
| $P_{srfA}$ library | <b>TTGNCA</b> AAAAACATTTTTTTTCAGNTANANTNGACGGTAGAAA                    |
| M26                | <b>TTGTCA</b> AAAAACATTTTTTTTCAGTTATCAGTGGACGGTAGAAA                   |
| M6                 | <b>TTGACA</b> AAAAACATTTTTTTTCAGCTA - <b>ACTCG</b> ACGG - AGAA -       |
| M21                | <b>TTGTCA</b> AAAAACATTTTTTTTCAGTTATA - <b>TCG</b> ACGGTAGAAA          |
| M16                | - - <b>G - C</b> - AAAACATTTTTTTTCAGTTACAATTGACGGTAGAAA                |
| M2                 | <b>TTGA</b> - - - - AACATTTTTTTTCAGATA <b>AAAGTCG</b> ACGGTAGAAA       |
| M3                 | <b>TTGGCA</b> AAAAACATTTTTTTTCAGATAC - <b>G</b> TAGA- - - - -AA        |
| M1                 | <b>TTG</b> - <b>T</b> AAAAACATTTTT - - CAGCTA <b>CACTCG</b> ACGGTAGAAA |
| M10                | <b>TTGCCA</b> AAAAACATTTTTTTTCAGTTAATAGTAGACGGTAGAAA                   |
| M40                | <b>TTGACA</b> AAAAACATTTTTTTTCAGATA - - - - <b>TG</b> ACGGTAGAAA       |
| M18                | <b>C - TGACA</b> AAAAACATTTTTTTTCAGCTAGACTAGACGGTAGAAA                 |
| M11                | - <b>TGCCA</b> AAAAACATTTTTTTTCAGATA <b>AAAGTCG</b> ACGGTAGAAA         |
| M22                | - <b>TGGCA</b> AAAAACATTTTTTTTCAGATAGACTGGACGGTAGAAA                   |
| M36                | <b>TTGTCA</b> AGAACATTTTTTTTCAAGGTAAAGTTGACGGTAGAAA                    |
| M20                | <b>TTGGCA</b> AAAAACATTTTTTTTCAGATAGATT <b>CG</b> ACGGTAGAAA           |
| M29                | <b>TTGTCA</b> AAAAACATTTTTTTTCA - <b>CTACAG</b> TTGACGGTAGAAA          |
| M28                | <b>TTGCCA</b> AAAAACATTTTTTTTCAGATAGACTTGACGGTAGAAA                    |
| M35                | <b>TTGTCA</b> AAAAACATTTTTTTTCAGGTTAGAGTTGAGGTAGAAA                    |
| M14                | <b>TTGCCA</b> AAAAACATTTTTTTTCAGATACAATAGGAGGTAGAAA                    |

The –35 region and –10 region of natural and engineered  $P_{srfA}$  promoters are in boldface in this table.

**Table S2.** Strains used in this study.

| Strains                | Relevant characteristics                                                | Source     |
|------------------------|-------------------------------------------------------------------------|------------|
| JM109                  | <i>E. coli</i> gene-cloning strain                                      | Novagen    |
| SN01                   | Ile-producing strain of <i>C. glutamicum</i> ssp. <i>lactofermentum</i> | CCTCC      |
| <i>B. subtilis</i> 168 | <i>rpC2</i>                                                             | Lab stock  |
| MG1655                 | F <sup>-</sup> , $\lambda$ <sup>-</sup> , <i>rph</i> <sup>-1</sup>      | Lab stock  |
| QS1T0                  | SN01 harboring pS1 and pSYW                                             | This study |
| RT1                    | SN01 harboring pT1                                                      | This study |
| RT2                    | SN01 harboring pT2                                                      | This study |
| QS1T2                  | SN01 harboring pS1 and pT2                                              | This study |
| RT3                    | SN01 harboring pT3                                                      | This study |
| RT4                    | SN01 harboring pT4                                                      | This study |
| RT5                    | SN01 harboring pT5                                                      | This study |
| QS1T5                  | SN01 harboring pS1 and pT5                                              | This study |
| QS1T6                  | SN01 harboring pS1 and pT6                                              | This study |
| QS1T7                  | SN01 harboring pS1 and pT7                                              | This study |
| QS1T8                  | SN01 harboring pS1 and pT8                                              | This study |
| QS2T6                  | SN01 harboring pS2 and pT6                                              | This study |
| QS3T6                  | SN01 harboring pS3 and pT6                                              | This study |
| QS4T6                  | SN01 harboring pS4 and pT6                                              | This study |
| QS5T6                  | SN01 harboring pS5 and pT6                                              | This study |
| QS2T9                  | SN01 harboring pS2 and pT9                                              | This study |
| QS3T9                  | SN01 harboring pS3 and pT9                                              | This study |
| QS4T9                  | SN01 harboring pS4 and pT9                                              | This study |
| QS5T9                  | SN01 harboring pS5 and pT9                                              | This study |
| QS2T10                 | SN01 harboring pS2 and pT10                                             | This study |
| QS3T10                 | SN01 harboring pS3 and pT10                                             | This study |
| QS4T10                 | SN01 harboring pS4 and pT10                                             | This study |
| QS5T10                 | SN01 harboring pS5 and pT10                                             | This study |

---

|        |                             |            |
|--------|-----------------------------|------------|
| QS2T11 | SN01 harboring pS2 and pT11 | This study |
| QS3T11 | SN01 harboring pS3 and pT11 | This study |
| QS4T11 | SN01 harboring pS4 and pT11 | This study |
| QS5T11 | SN01 harboring pS5 and pT11 | This study |
| QS1T12 | SN01 harboring pS1 and pT12 | This study |
| QS1T13 | SN01 harboring pS1 and pT13 | This study |
| QS1T14 | SN01 harboring pS1 and pT14 | This study |
| QS1T15 | SN01 harboring pS1 and pT15 | This study |
| QS1T16 | SN01 harboring pS1 and pT16 | This study |
| QS1T17 | SN01 harboring pS1 and pT17 | This study |
| QS1T18 | SN01 harboring pS1 and pT18 | This study |
| QS1T19 | SN01 harboring pS1 and pT19 | This study |
| QS1T20 | SN01 harboring pS1 and pT20 | This study |
| QS1T21 | SN01 harboring pS1 and pT21 | This study |
| QS1T22 | SN01 harboring pS1 and pT22 | This study |
| QS1T23 | SN01 harboring pS1 and pT23 | This study |
| QS1T24 | SN01 harboring pS1 and pT24 | This study |
| QS1T25 | SN01 harboring pS1 and pT25 | This study |
| QS1T26 | SN01 harboring pS1 and pT26 | This study |
| QS1T27 | SN01 harboring pS1 and pT27 | This study |
| RT22   | SN01 harboring pT22         | This study |
| RT23   | SN01 harboring pT23         | This study |
| RT24   | SN01 harboring pT24         | This study |
| RT25   | SN01 harboring pT25         | This study |
| RT26   | SN01 harboring pT26         | This study |
| RT27   | SN01 harboring pT27         | This study |

---

**Table S3.** Plasmids used in this study.

| Plasmids           | Relevant characteristics                                                                                                              | Source            |
|--------------------|---------------------------------------------------------------------------------------------------------------------------------------|-------------------|
| pDTW109            | <i>cre</i> -expressing vector of <i>C. glutamicum</i> , temperature sensitive, Cm <sup>R</sup>                                        | <a href="#">1</a> |
| pDTW107            | pDTW109 without <i>cre</i>                                                                                                            | This study        |
| pIL-I              | derivative of pJYW-4 in which P <sub>tacM</sub> is replaced by <i>lrp</i> and P <sub>bmFE</sub> -controlled <i>ido</i>                | <a href="#">2</a> |
| pS1                | <i>comQXPA</i> operon under P <sub>bmFE</sub> in pDTW107                                                                              | This study        |
| pS2                | <i>mCherry</i> under M1 in pS1                                                                                                        | This study        |
| pS3                | <i>mCherry</i> under M11 in pS1                                                                                                       | This study        |
| pS4                | <i>mCherry</i> under M22 in pS1                                                                                                       | This study        |
| pS5                | <i>mCherry</i> under P <sub>srjA</sub> in pS1                                                                                         | This study        |
| pJYW-4             | constitutive expression vector of <i>C. glutamicum</i> , Km <sup>R</sup>                                                              | <a href="#">3</a> |
| pJYW-4- <i>gfp</i> | pJYW-4 harboring <i>gfp</i> under P <sub>tacM</sub> promoter                                                                          | <a href="#">2</a> |
| pSYW               | pJYW-4 without <i>alr</i>                                                                                                             | <a href="#">2</a> |
| pT1                | <i>gfp</i> under P <sub>tacM</sub> in pSYW                                                                                            | This study        |
| pT2                | <i>gfp</i> under P <sub>srjA</sub> in pSYW                                                                                            | This study        |
| pT3                | <i>gfp</i> under P <sub>tacM</sub> and <i>hfq</i> under P <sub>tacM</sub> in pSYW                                                     | This study        |
| pT4                | <i>gfp</i> under P <sub>tacM</sub> and sRNA targeting <i>gfp</i> under P <sub>tacM</sub> in pSYW                                      | This study        |
| pT5                | <i>gfp</i> under P <sub>tacM</sub> , <i>hfq</i> under P <sub>tacM</sub> and sRNA targeting <i>gfp</i> under P <sub>tacM</sub> in pSYW | This study        |
| pT6                | <i>gfp</i> under P <sub>tacM</sub> , <i>hfq</i> under P <sub>srjA</sub> and sRNA targeting <i>gfp</i> under P <sub>tacM</sub> in pSYW | This study        |
| pT7                | <i>gfp</i> under P <sub>tacM</sub> , <i>hfq</i> under P <sub>tacM</sub> and sRNA targeting <i>gfp</i> under P <sub>srjA</sub> in pSYW | This study        |
| pT8                | <i>gfp</i> under P <sub>tacM</sub> , <i>hfq</i> under P <sub>srjA</sub> and sRNA targeting <i>gfp</i> under P <sub>srjA</sub> in pSYW | This study        |
| pT9                | <i>gfp</i> under P <sub>tacM</sub> , <i>hfq</i> under M1 and sRNA targeting <i>gfp</i> under P <sub>tacM</sub> in pSYW                | This study        |
| pT10               | <i>gfp</i> under P <sub>tacM</sub> , <i>hfq</i> under M11 and sRNA targeting <i>gfp</i> under P <sub>tacM</sub> in pSYW               | This study        |
| pT11               | <i>gfp</i> under P <sub>tacM</sub> , <i>hfq</i> under M22 and sRNA targeting <i>gfp</i> under P <sub>tacM</sub> in pSYW               | This study        |
| pT12               | <i>amyE</i> under M14 in pSYW                                                                                                         | This study        |
| pT13               | <i>amyE</i> under M20 in pSYW                                                                                                         | This study        |
| pT14               | <i>amyE</i> under M28 in pSYW                                                                                                         | This study        |
| pT15               | <i>amyE</i> under P <sub>srjA</sub> in pSYW                                                                                           | This study        |
| pT16               | <i>amyE</i> under M14, <i>hfq</i> under M1 and sRNA targeting <i>amyE</i> under P <sub>tacM</sub> in pSYW                             | This study        |

|      |                                                                                                     |            |
|------|-----------------------------------------------------------------------------------------------------|------------|
| pT17 | <i>amyE</i> under M20, <i>hfq</i> under M1 and sRNA targeting <i>amyE</i> under $P_{tacM}$ in pSYW  | This study |
| pT18 | <i>amyE</i> under M28, <i>hfq</i> under M1 and sRNA targeting <i>amyE</i> under $P_{tacM}$ in pSYW  | This study |
| pT19 | <i>amyE</i> under M14, <i>hfq</i> under M11 and sRNA targeting <i>amyE</i> under $P_{tacM}$ in pSYW | This study |
| pT20 | <i>amyE</i> under M20, <i>hfq</i> under M11 and sRNA targeting <i>amyE</i> under $P_{tacM}$ in pSYW | This study |
| pT21 | <i>amyE</i> under M28, <i>hfq</i> under M11 and sRNA targeting <i>amyE</i> under $P_{tacM}$ in pSYW | This study |
| pT22 | <i>gfp</i> under M1 in pSYW                                                                         | This study |
| pT23 | <i>gfp</i> under M11 in pSYW                                                                        | This study |
| pT24 | <i>gfp</i> under M14 in pSYW                                                                        | This study |
| pT25 | <i>gfp</i> under M20 in pSYW                                                                        | This study |
| pT26 | <i>gfp</i> under M22 in pSYW                                                                        | This study |
| pT27 | <i>gfp</i> under M28 in pSYW                                                                        | This study |

---

**Table S4.** Primers used in this study.

| Primer                                 | Sequence                                                                   | Plasmid construction     |
|----------------------------------------|----------------------------------------------------------------------------|--------------------------|
| <i>comQ</i> -F                         | GAGAAGGAGTTATAGGATGAAGGAGATTGTGGAGC                                        | pS1                      |
| <i>comA</i> -R                         | TGAGCTGCTCGAGATATTTAAAGTACACCGTCTGAT                                       | pS1                      |
| <i>lrp</i> -P <sub>brnFE</sub> -F      | GTATACCTGCAGAGATTAATTTACACCTGGGGGCGAGCT                                    | pS1                      |
| pDTW107-R                              | CCTATAACTCCTTCTCTCCAG                                                      | pS1                      |
| <i>srfA</i> -F ( <i>KpnI</i> )         | ATAGGTACCTAGTGGAAATGATTGCGGCAT                                             | pT2, pT2 library         |
| P <sub>srfA</sub> -F ( <i>hfq</i> )    | TAGTGGAAATGATTGCGGCATC                                                     | pT6, pT8                 |
| <i>srfA</i> -R                         | CCTATACCTCCTTCTCAATATTTTTATCTTTCTACCG                                      | pT2, pT6, pT8            |
| <i>gfp</i> -F (RBS)                    | AGAAGGAGGTATAGGATGAGTAAAGGAGAAGAAC                                         | pT2                      |
| <i>gfp</i> -R ( <i>Bam</i> HI)         | ATAGGATCCCTATTTGTATAGTTCATCC                                               | pT2, pT2 library         |
| <i>srfAM</i>                           | CTCAATATTTTTATCTTTCTACCGTCNANTNTANCTGAAAA<br>AAATGTTT TTGNCAACGAAAAATGGGTG | pT2 library              |
| <i>gfp</i> (P <sub>tacM</sub> )-F      | CGCATATGTTTGGTACCCTATTTGTATAGTTCATCC                                       | pT1                      |
| P <sub>tacM</sub> (sRNA)-F             | CCGCATATGTTTGGTACCTGAGCTGTTGACAATTAATC                                     | pT3–pT6, pT9–pT11        |
| P <sub>tacM</sub> (RBS)-R              | CCTATACCTCCTTCTAATTG                                                       | pT5, pT7                 |
| <i>rrmBT1T2</i> -R                     | GCCGCAATCATTTCCTACTACGCCAGGAGGTCGAAG                                       | pT6, pT8–pT11, pT16–pT21 |
| <i>hfq</i> (RBS)-F                     | AGAAGGAGGTATAGGATGGCTAAGGGGCAATCTT                                         | pT5–pT11, pT16–pT21      |
| <i>hfq</i> -R                          | GTTGACTATTTTACCTCTGGTTATTCGGTTTCTTCGCT                                     | pT5–pT11                 |
| <i>gfp</i> (sRNA)-F                    | GAGGTAAAATAGTCAACCTATTTGTATAGTTCATCC                                       | pT5–pT11                 |
| <i>gfp</i> (sRNA)-R                    | GAATTCGTCGACGGATCCTGAGCTGTTGACAATT                                         | pT1, pT3–pT11            |
| P <sub>srfA</sub> (sRNA)-F             | TATTTACACCCGCATATTAGTGGAAATGATTGCG                                         | pT7–pT21                 |
| P <sub>srfA</sub> (sRNA)-R             | AAGGAGAAGAAGCTTTTCCAATATTTTTATCTTTCTACCG                                   | pT7, pT8                 |
| <i>srfA</i> -R2                        | CCTATACCTCCTTCTCAAT                                                        | pT9–pT21, pS2–pS5        |
| sRNA ( <i>gfp</i> )-F                  | GAAAAGTTCTTCTCCTTTACTCAT                                                   | pT7, pT8                 |
| <i>rrmB</i> T1T2 ( <i>gfp</i> )-R      | GGATGAACTATACAAATAGCGCCCAGGAGGTCGAAGC                                      | pT4                      |
| <i>gfp</i> ( <i>rrmB</i> T1T2)-F       | GCTATTTGTATAGTTCATCC                                                       | pT4                      |
| P <sub>srfA</sub> ( <i>mCherry</i> )-F | AGCTCGTATACCTGCATAGTGGAAATGATTGCG                                          | pS2–pS5                  |
| <i>mCherry</i> -F (RBS)                | AGAAGGAGGTATAGGATGGTGAGCAAGGGCGAG                                          | pS2–pS5                  |

---

|                                  |                                                              |           |
|----------------------------------|--------------------------------------------------------------|-----------|
| <i>mCherry</i> -R                | GGTGTGAAATTAATCTCTTACTTGTACAGCTCGTC                          | pS2–pS5   |
| 2070-F                           | TTGAGAAGGAGGTATAGGACAGCTAACTCGGTCAGC                         | pT12–pT15 |
| 2070-R                           | CGATTTGTTTCGCCGTTTCTGCCTGTGCTGGGGAGG                         | pT12–pT15 |
| <i>amyE</i> -U-F                 | GAAACGGCGAACAAATCGAATG                                       | pT12–pT15 |
| <i>amyE</i> -D-R                 | GAATTCGTCGACGGATCCTTAATGATGATGATGATGATGATG<br>GGGAAGAGAACCGC | pT12–pT15 |
| <i>P<sub>tacM</sub></i> (pSYW)-F | ATTCGTCGACGGATCCTGAGCTGTTGACAATTAATCAT                       | pT16–pT21 |
| sRNA ( <i>amyE</i> )-R           | GAAACGGCGAACAAATCGAAAATTGTTATCCGCTCACAAT                     | pT16–pT21 |
| sRNA ( <i>amyE</i> )-F           | TTCGATTTGTTTCGCCGTTTTCGTTATATGCCTTTATTGTC                    | pT16–pT21 |
| <i>hfq</i> (6xHis)-R             | CATCATCATCATCATTAATTATTCGGTTTCTTCGCTGTCC                     | pT16–pT21 |
| 16S rRNA-1                       | ACCTGGAGAAGAAGCACCG                                          |           |
| 16S rRNA-2                       | TCAAGTTATGCCCCGTATCG                                         |           |
| qPCR- <i>gfp</i> -F              | GCGTTCAACTAGCAGACCATTTATC                                    |           |
| qPCR- <i>gfp</i> -R              | GTTCATCCATGCCATGTGTAATCC                                     |           |

---



**Table S5.** Sequences of sRNAs in this study.

| Target gene | 24-mer target binding sequence of sRNA |
|-------------|----------------------------------------|
| <i>gfp</i>  | GAAAAGTTCTTCTCCTTTACTCAT               |
| <i>amyE</i> | CTCATTCGATTTGTTGCGCCGTTTC              |

**Figure S1.** Regulatory mechanism of the ComQXPA- $P_{srfA}$  QS system in *B. subtilis*. When the cells grow to a high density, ComQ inverts the precursor of ComX to the ComX pheromone and exports it to the extracellular environment. The membrane protein ComP monitors the secreted ComX pheromone to phosphorylate ComA. Phosphorylated ComA binds to the  $P_{srfA}$  promoter to activate the expression of the *srfA* operon, which is involved in surfactin biosynthesis.

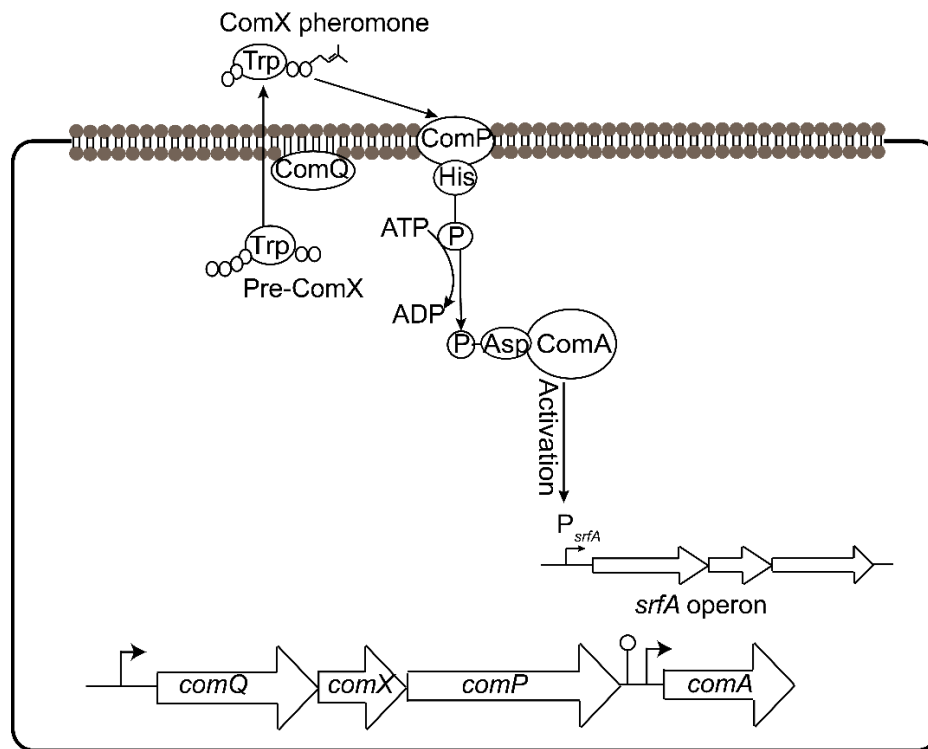

**Figure S2** Fitted curve of strain QS1T2. QS1T2 carried pS1, which contained the  $P_{brnFE}$ -regulated *comQXPA* operon, and pT2, which contained  $P_{srjA}$ -controlled *gfp*.

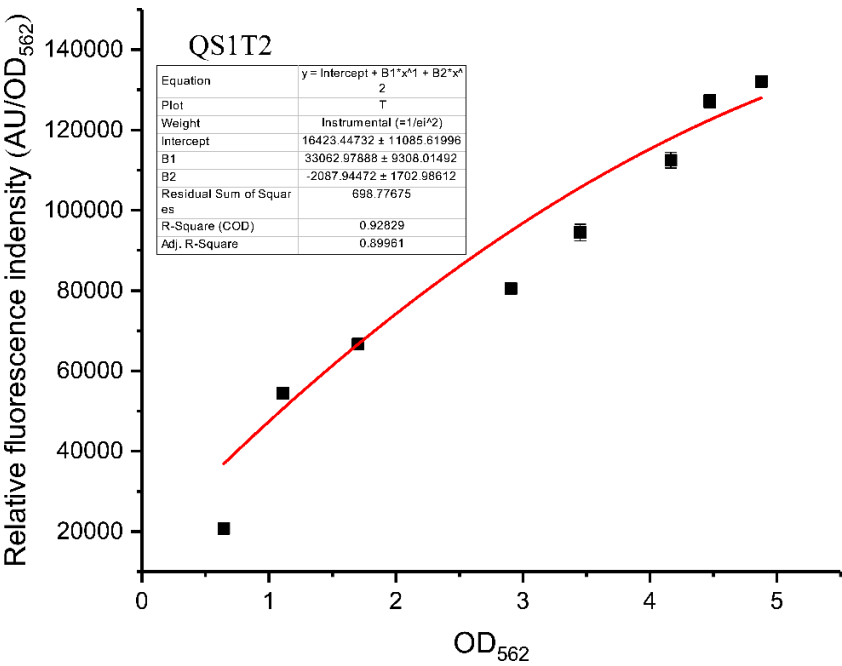

**Figure S3.** Architecture of the ComQXPA- $P_{srfA}$  QS-based *hfq*-sRNA circuit. The sRNA platform for repression consists of a target sRNA, a MicC scaffold and a sRNA chaperone Hfq protein. The sRNA (target)-MicC scaffold or *hfq* is regulated by the  $P_{srfA}$  promoter, resulting in the repression of the target gene in a cell density-dependent manner via the ComQXPA- $P_{srfA}$  QS-based *hfq*-sRNA circuit. In pT6, sRNA targeting *gfp* [sRNA(*gfp*)] is controlled by the  $P_{tacM}$  promoter, and *hfq* is controlled by the  $P_{srfA}$  promoter. In pT7, sRNA(*gfp*) is controlled by the  $P_{srfA}$  promoter, and *hfq* is controlled by the  $P_{tacM}$  promoter. In pT8, both sRNA(*gfp*) and *hfq* are controlled by the  $P_{srfA}$  promoter, while in pT5, both sRNA(*gfp*) and *hfq* are controlled by the  $P_{tacM}$  promoter. These plasmids were individually introduced into the *C. glutamicum* strain carrying the pS1 plasmid, resulting in QS1T5, QS1T6, QS1T7 and QS1T8.

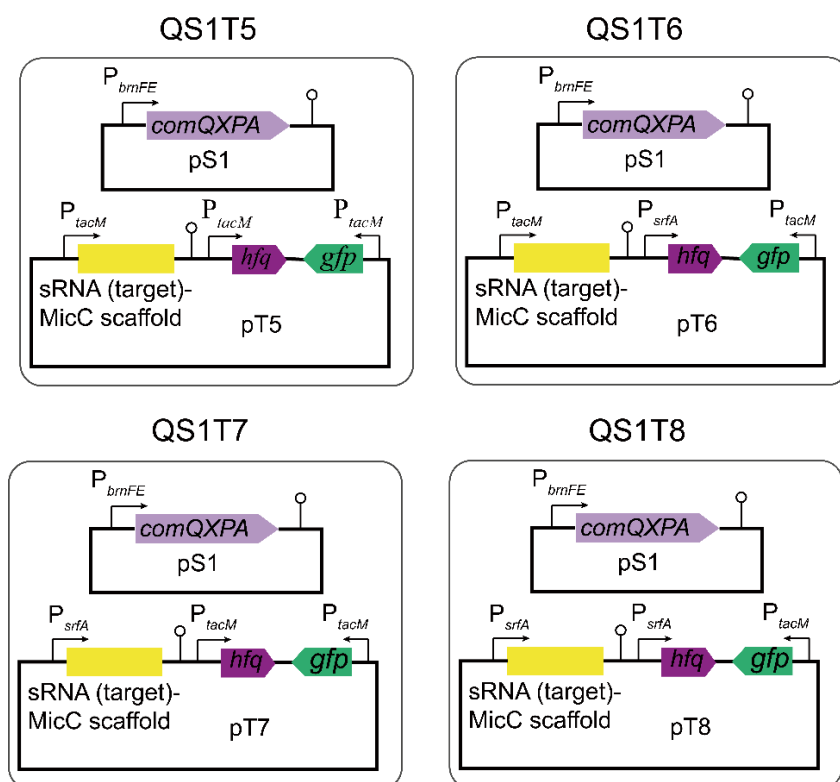

**Figure S4.** Fitted curves of strains QS1T22, QS1T23, QS1T24, QS1T25, QS1T26 and QS1T27. These strains carried different pT plasmids, i.e., pT22, pT23, pT24, pT25, pT26 and pT27 harbored M1-, M11-, M14-, M20-, M22- and M28-regulated *gfp*, respectively.

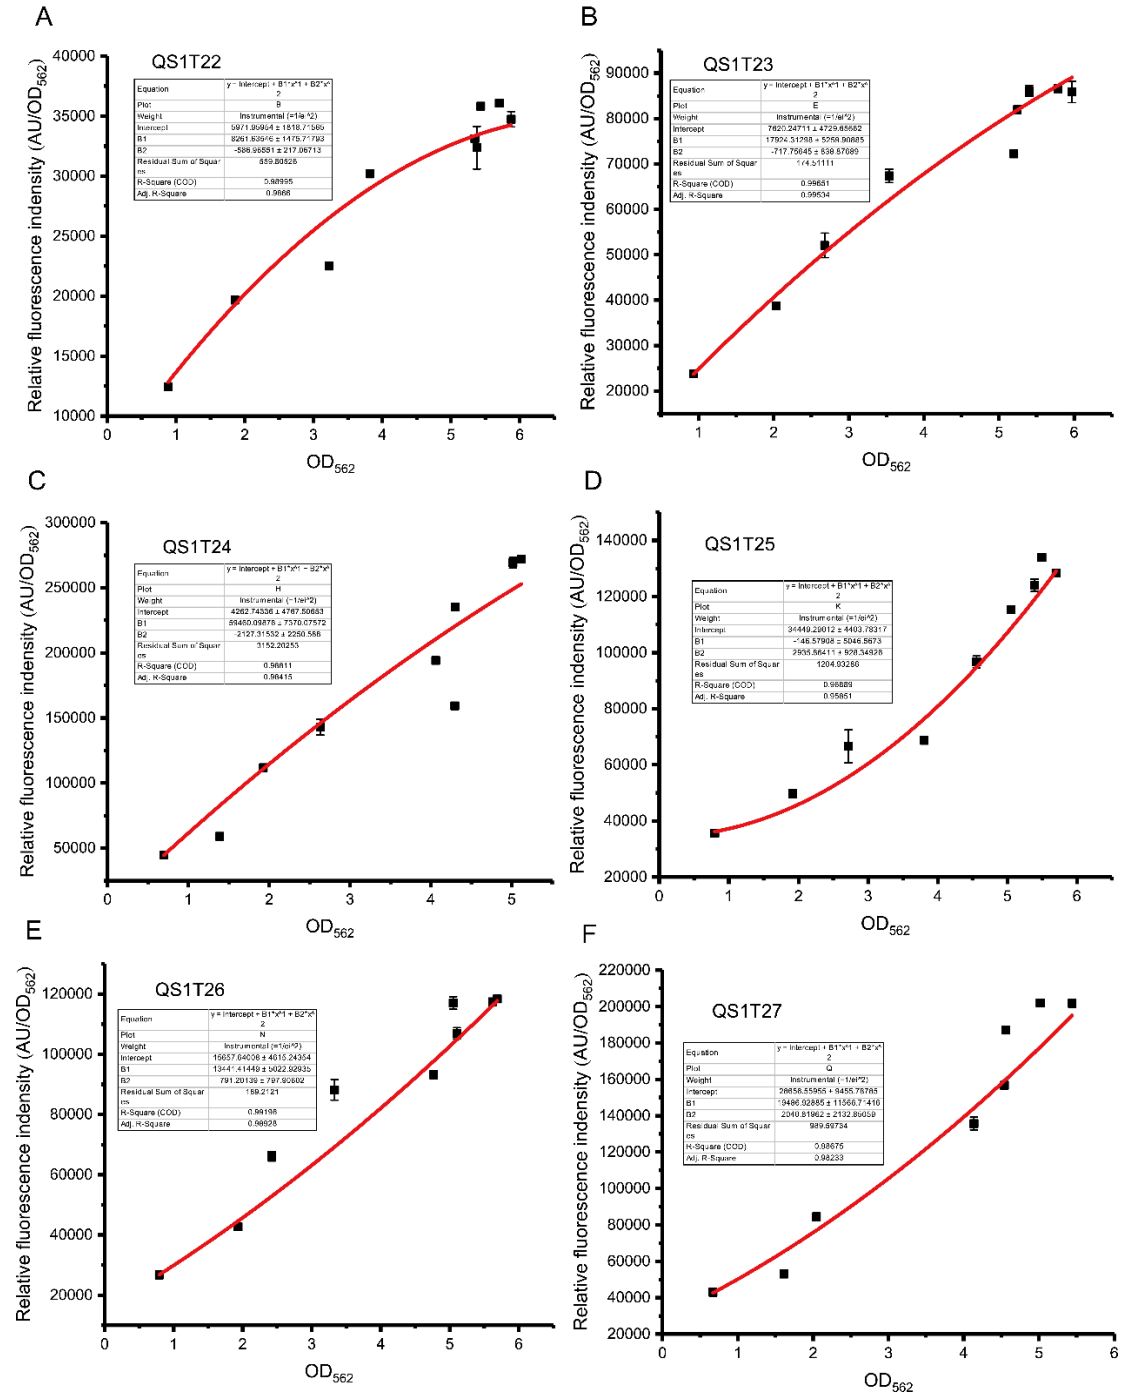

**Figure S5.** SDS-PAGE of different *amyE*-expressing strains regulated by ComQXPA- $P_{srfA}$  QS circuits. *amyE* was upregulated by M14, M20, M28 and native  $P_{srfA}$  in strains QS1T12, QS1T13, QS1T14 and QS1T15, respectively. In addition to M14-, M20- or M28-regulated *amyE*, sRNA(*amyE*)-coupled *hfq* was also regulated by M1 or M11 in strains QS1T16–QS1T21. The culture supernatants of the corresponding *C. glutamicum* strains at 48 h were loaded. Red arrow indicated the amylase, 68 kDa. CM: culture supernatant of fresh medium. QS1T0: SN01 harboring pS1 and pSYW.

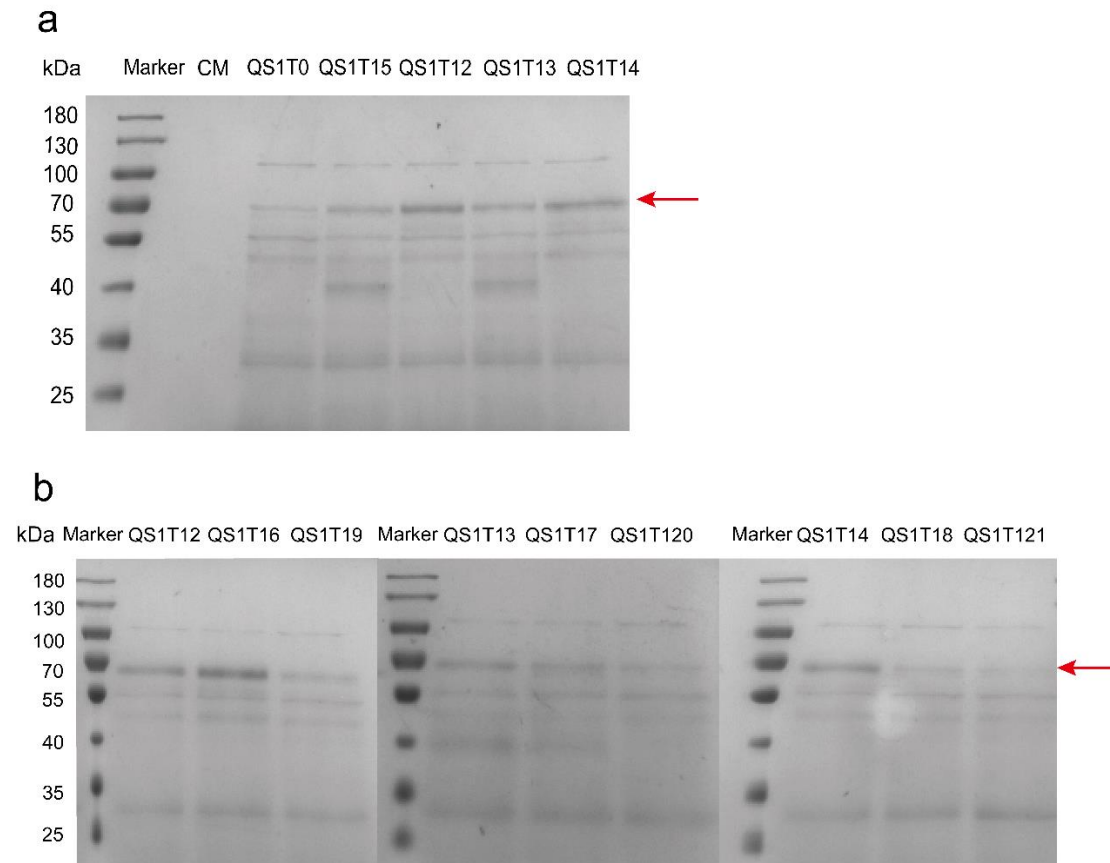

**Figure S6.** Inhibition efficiency of different  $P_{srfA}$ -regulated *hfq*-sRNA cassettes targeting *amyE* in *C. glutamicum*. Compared to the ComQXPA- $P_{srfA}$  QS-upregulated *amyE*-expressing strains QS1T12, QS1T13 and QS1T14, the M1-regulated *hfq*-sRNA cassette targeting *amyE* suppressed *amyE* expression by an efficiency of 8%–70% in strains QS1T16–QS1T18, while the M11-regulated *hfq*-sRNA(*amyE*) suppressed *amyE* expression by an efficiency of 100% in strains QS1T19–QS1T21. The data represent the means  $\pm$  SD. \*  $p < 0.05$ , \*\*\*  $p < 0.001$  compared with the corresponding *amyE*-upregulated strains (QS1T12 or QS1T13 or QS1T14).

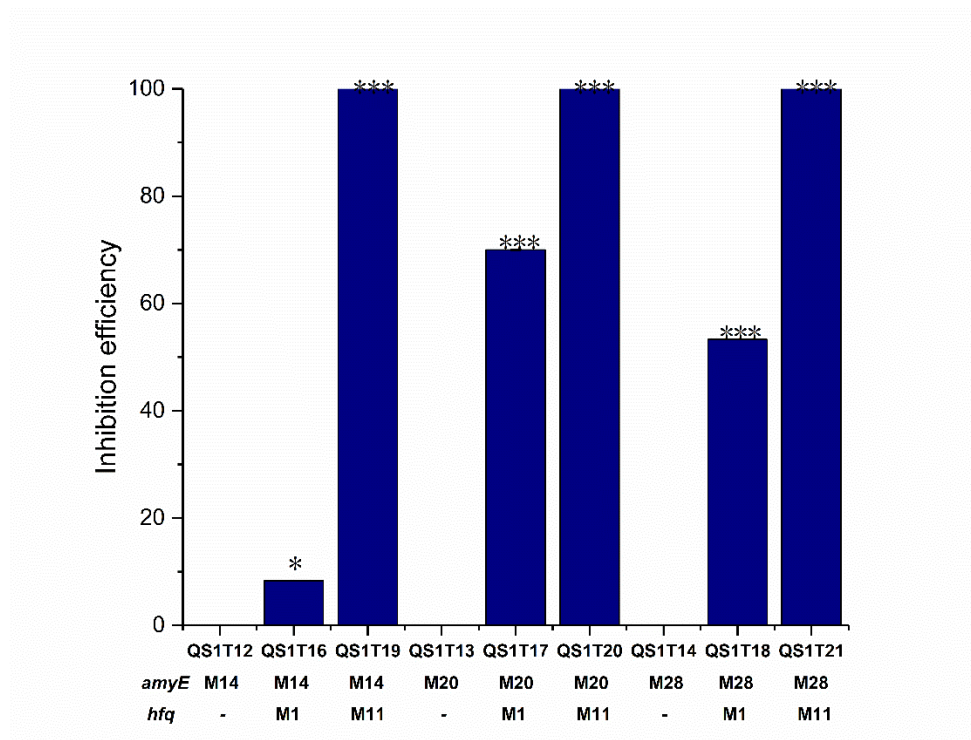

## References

- (1) Hu, J., Tan, Y., Li, Y., Hu, X., Xu, D. and Wang, X. (2013) Construction and application of an efficient multiple-gene-deletion system in *Corynebacterium glutamicum*. *Plasmid* 70, 303–313.
- (2) Tan, S., Shi, F., Liu, H., Yu, X., Wei, S., Fan, Z., Li, Y. (2020) Dynamic control of 4-hydroxyisoleucine biosynthesis by modified l-isoleucine biosensor in recombinant *Corynebacterium glutamicum*. *ACS Synth. Biol.* 9 (9), 2378–2389.
- (3) Hu, J., Li, Y., Zhang, H., Tan, Y., and Wang, X. (2014) Construction of a novel expression system for use in *Corynebacterium glutamicum*. *Plasmid* 75, 18–26.
